# Supplementary material for: Clinical Outcomes of Pediatric Patients on Topical Ruxolitinib for Acute and Chronic Skin GVHD
Source: Research Square preprint supplement (doi:10.21203/rs.3.rs-3483319/v1), 2023-10-27
Supplement: Supplementary file 1 [file df1c2de751378baa828133f8.docx]

Table 1. Demographics

| **Patient** | **Type of Transplant** | **Age at Transplant (years)** | **Gender** | **Diagnosis** | **HLA match** | **Donor** | **Conditioning regimen** | **MAC/RIC** | **Immunosuppression** |
| --- | --- | --- | --- | --- | --- | --- | --- | --- | --- |
| **ACUTE GVHD** | | | | | | | | | |
|  | HSCT | 18 | M | AML | 10/10 | Matched unrelated donor | Busulfan/ Cyclophosphamide | MAC | CSA/MMF/Abatacept |
|  | HSCT | 0.92 | M | SCID | 7/10 | Mismatched related donor | Campath/Fludarabine/  Melphalan/Thiotepa | RIC | CSA/MMF/Abatacept |
|  | HSCT | 9 | M | SCN | 10/10 | Matched unrelated donor | Busulfan/ Cyclophosphamide | MAC | CSA/MMF/Abatacept |
|  | HSCT | 18 | M | T cell ALL | 5/10 | Mismatched related donor | TBI/ Cyclophosphamide | MAC | Tacrolimus/MMF/Post transplant Cyclophosphamide |
|  | HSCT | 3 | F | B cell ALL | 7/10 | Mismatched unrelated donor | TBI/ Cyclophosphamide | MAC | CSA/MMF |
|  | SOT- Liver, pancreas, and small bowel transplant | 3 | F | Hepatoblast-oma with mesenteric thrombus | N/A | Unrelated donor | N/A | N/A | ATG/Methylprednisone/ Tacrolimus |
|  | SOT- Liver, pancreas, and small bowel transplant | 8 | M | Hypoplastic left colon, malrotation with midgut volvulus, cholestatic liver disease | N/A | Unrelated donor | N/A | N/A | ATG/Methylprednisone/ Tacrolimus |
| **CHRONIC GVHD** | | | | | | | | | |
|  | HSCT | 17 | M | MDS | 10/10 | Matched unrelated donor | Clofarabine/Thiotepa/Melphalan | MAC | CSA/MMF/Abatacept |
|  | HSCT | 37 | F | AML | 10/10 | Matched unrelated donor | Busulfan/  Cyclophosphamide | MAC | CSA/MMF/Abatacept |
|  | HSCT | 14 | M | AML | 10/10 | Matched unrelated donor | ATG/Busulfan/ Cyclophosphamide | MAC | CSA/MMF |

ALL-Acute lymphocytic leukemia, AML- Acute myeloid leukemia, ATG- Antithymocyte globulin, CSA- Cyclosporine, HLA- Human Leukocyte Antigen, HSCT-Hematopoietic Stem Cell Transplant, MAC- Myeloablative conditioning, MDS- Myelodysplastic Syndrome, MMF-Mycophenolate mofetil RIC- Reduced intensity conditioning, SCID- Severe Congenital Immune Deficiency, SCN- Severe Congenital Neutropenia, SOT- Solid Organ Transplant.

| **Patient** | **Day of diagnosis post-transplant of acute GvHD development** | **Organ(s) Involved** | **Stage** | **Grade** | **Topical treatments prior to topical Ruxolitinib** | **Systemic treatments prior to topical ruxolitinib** | **New systemic treatments on or after topical ruxolitinib initiation until Day 28 evaluation/or earlier if CR or toxicity** |
| --- | --- | --- | --- | --- | --- | --- | --- |
| 1 | 44 | Skin | Stage 2 | Grade 1 | Triamcinolone/Hydrocortisone | 1 | 0 |
| 2 | 118 | Skin | Stage 3 | Grade 2 | Skin:  Tacrolimus ointment  Calcipotriene  Hydrocortisone/Triamcinolone  Scalp:  Fluocinonide/Selsun Blue/Ketoconazole shampoo/ Calcipotriene | 4 | 1 |
| 3 | 147 | Skin  GI  Liver | Skin Stage 2  GI Stage 4  Liver Stage 4 | Grade 4 | Kenalog  Calcipotriene | 3 | 1 |
| 4 | 61 | Skin | Stage 3 | Grade 2 | Hydrocortisone/ Triamcinolone | 0 | 0 |
| 5 | 52 | Skin  GI | Skin Stage 2  GI Stage 1 | Grade 2 | Calcipotriene | 0 | 0 |
| 6 | 9 | Skin | Stage 3 | Grade 2 | Kenalog/Hydrocortisone  Calcipotriene | 3 | 0 |
| 7 | 130 | Skin | Stage 2 | Grade 1 | None | 0 | 0 |

Table 2. Acute GVHD Treatment

Table 3. Chronic GvHD

| **Patient** | **Prior aGvHD** | **Day post-transplant of cGVHD diagnosis** | **Organ involvement** | **NIH Grade of cGVHD** | **Ongoing systemic treatments** | **New systemic treatments on or after topical ruxolitinib initiation until 3 months, or earlier if CR or toxicity** |
| --- | --- | --- | --- | --- | --- | --- |
| 8 | Yes | 172 | Skin  Oral mucosa  GI | Severe | 3 | 0 |
| 9 | Yes | 199 | Skin  Ocular  Oral  Vagina  Lungs  Joints/ fascia | Moderate | 0 | 0 |
| 10 | Yes | 240 | Skin  Ocular  Oral  GI  Liver  Joints/Fascia | Severe | 3 | 2 |

Table 4. Responses and Toxicity to Topical Ruxolitinib

| **Patient** | **Skin Classification** | **% BSA of erythematous rash** | **Total duration of Ruxolitinib** | **Response** | **Toxicity/ side effects** | **Relatedness of toxicity to topical ruxolitinib** |
| --- | --- | --- | --- | --- | --- | --- |
| **ACUTE GVHD** | | | | | | |
|  | Stage 2 | 25-30% | 118 | Partial response | None | N/A |
|  | Stage 3 | >50% | 156 | Not evaluable | Klebsiella Bacteremia, Staph Epidermidis Bacteremia, Lactobacillus Bacteremia | Unrelated |
|  | Stage 2 | 25-30% | 24 | Not evaluable | Multiorgan failure leading to death | Unrelated |
|  | Stage 3 | >50% | 83 | Complete response | BK viruria/hemorrhagic cystitis existing, enterococcus urinary tract infection | Unrelated |
|  | Stage 2 | 25-30% | 137 | Complete response | None | N/A |
|  | Stage 3 | >50% | 50 | No response | Grade 1 Neutropenia | Unrelated |
|  | Stage 2 | 30-35% | 52 | Partial Response | None | N/A |
| **CHRONIC GVHD** | | | | | | |
|  | Score: 3 Deep sclerotic features, hidebound | 1-18% | 34 | Partial Response | Increased itch | Possibly related |
|  | Score 1:  Non-sclerotic - maculopapular | 1-18% | 57 | Complete Response | Perineal cellulitis/ Herpes simplex virus+ | Unrelated |
|  | Score: 3 Deep sclerotic, hidebound areas. | 19-50% | 427 | Not Evaluable | None | N/A |
